# Supplementary material for: Genomagnetic assay for electrochemical detection of osteogenic differentiation in mesenchymal stem cells
Source: Royal Society of Chemistry journal article supplement (doi:10.1039/c3an00912b), 2013-01-01
Supplement: c3an00912b.pdf [file c3an00912b.pdf]

Supplementary Information

**GENOMAGNETIC ASSAY FOR ELECTROCHEMICAL  
DETECTION OF OSTEOGENIC DIFFERENTIATION IN  
MESENCHYMAL STEM CELLS**

**Arzum Erdem<sup>a,\*</sup>, Gokhan Duruksu<sup>b</sup>, Gulsah Congur<sup>a</sup> and Erdal Karaoz<sup>b,\*</sup>**

† **Electronic Supplementary Information (ESI) available:** Characterization by flow cytometry, the histograms and tables representing the results for electrochemical detection of sequence-selective DNA hybridization related to OSC, OSN and OSP.

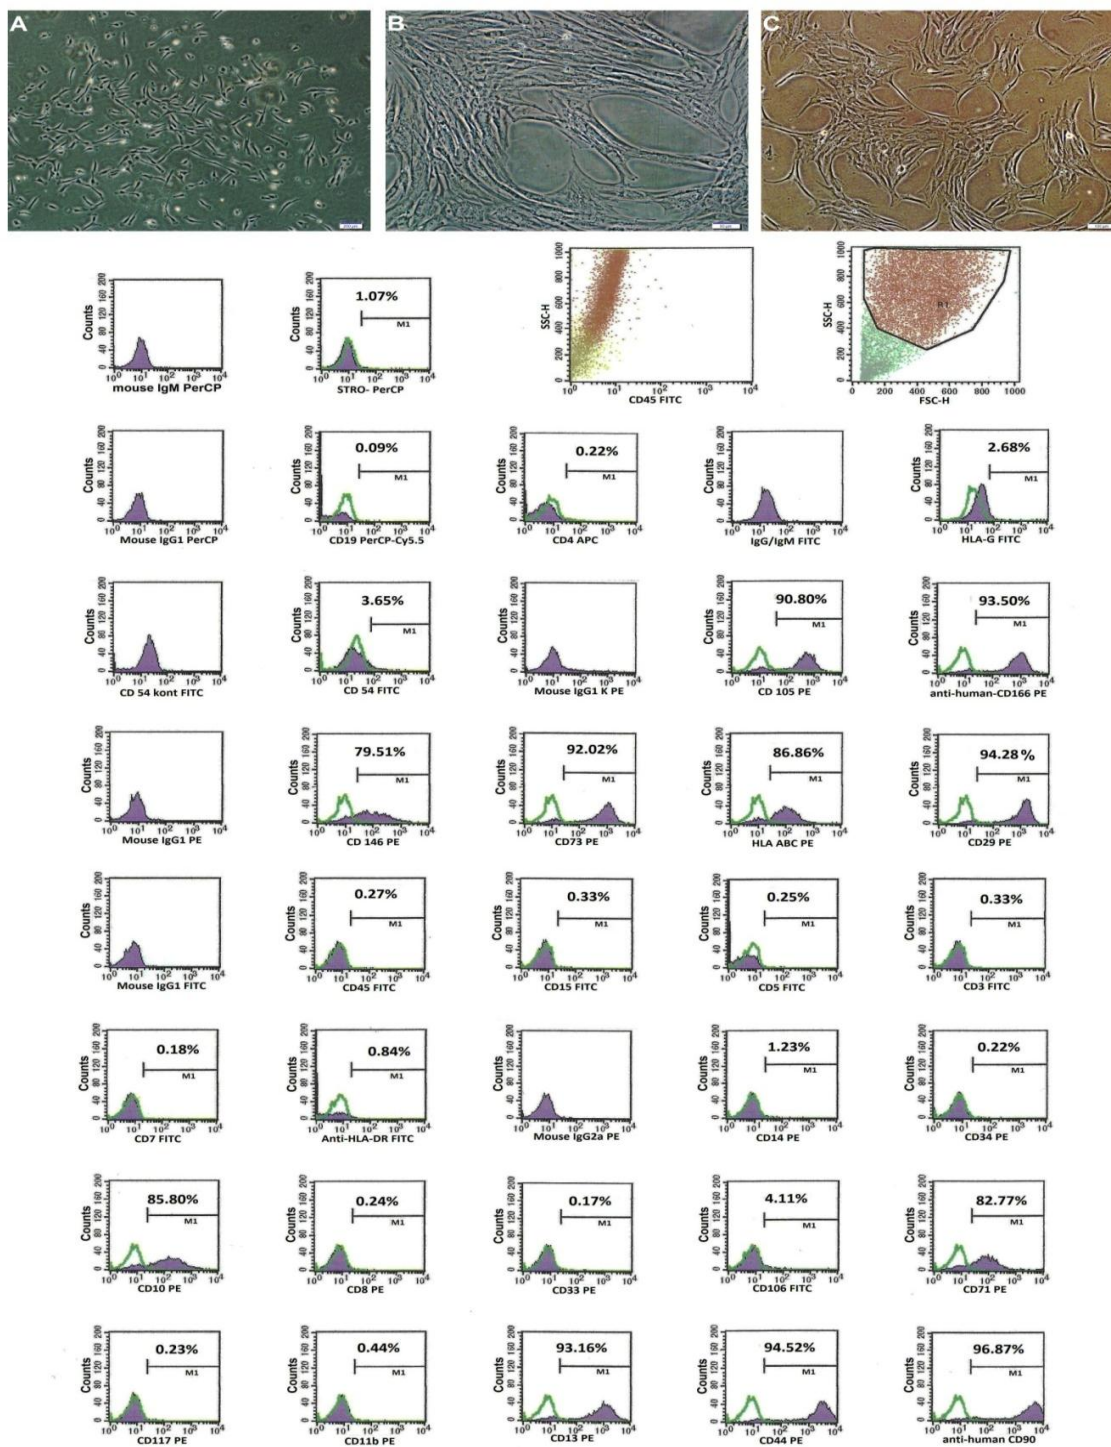

**Fig. S1.** Culture of hBM-MSCs and characterization by flow cytometry. Colony formation of stem cells after isolation (A; P0, 8 days). Morphology of hBM-MSCs in culture represented large, flattened structures (B; P1, 17 days. C; P3, 3 days). Representative flow cytometry analysis of cell-surface markers of MSCs (D; P3).

**Table S1.** The changes at the oxidation signals of guanine and adenine after hybridization between each DNA probe and its complementary target; OSC, OSN and OSP.

|            | <b>Guanine</b> | <b>Adenine</b> |
|------------|----------------|----------------|
| <b>OSC</b> | % 140 increase | % 100 increase |
| <b>OSN</b> | % 30 decrease  | % 283 increase |
| <b>OSP</b> | % 25 decrease  | % 100 increase |

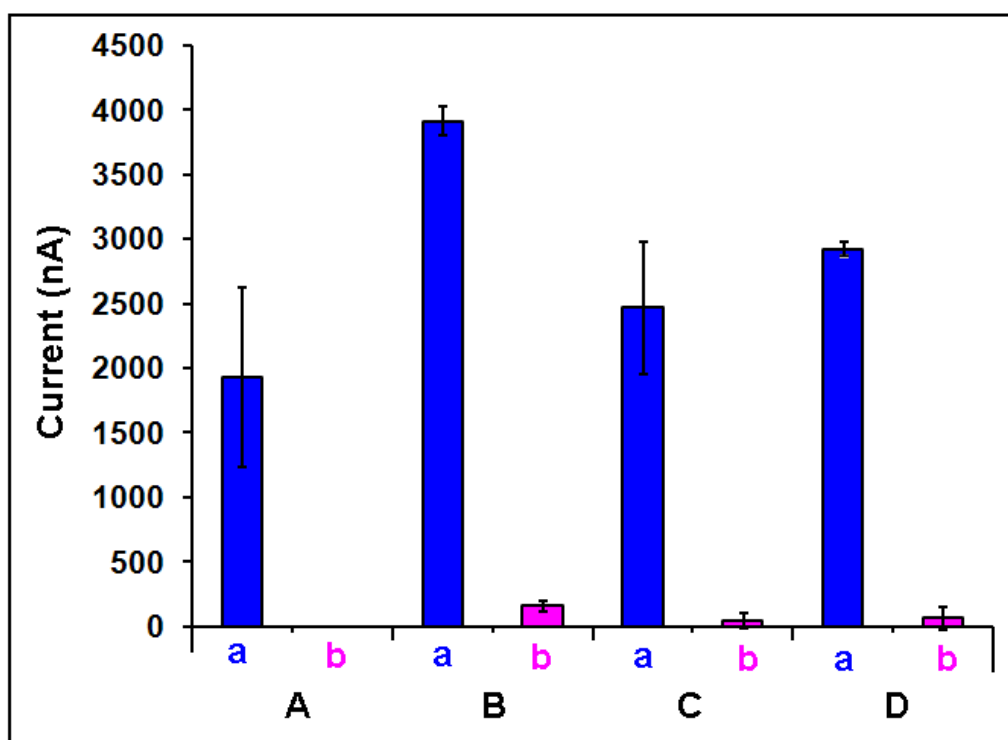

**Fig. S2.** Histograms representing the guanine (a) and adenine (b) signals by using OSC DNA probe immobilized magnetic particles before hybridization (A) and after hybridization in the presence of OSC complementary target (B), OSN target (C) and OSP target (D).

**Table S2.** Changes in the oxidation signals of guanine and adenine signals after hybridization between OSC DNA probe and its complementary target (A), OSN target (B) and OSP target (C).

|   | Guanine        | Adenine        |
|---|----------------|----------------|
| A | %102 increased | %100 increased |
| B | %28 increased  | %100 increased |
| C | %51 increased  | %100 increased |

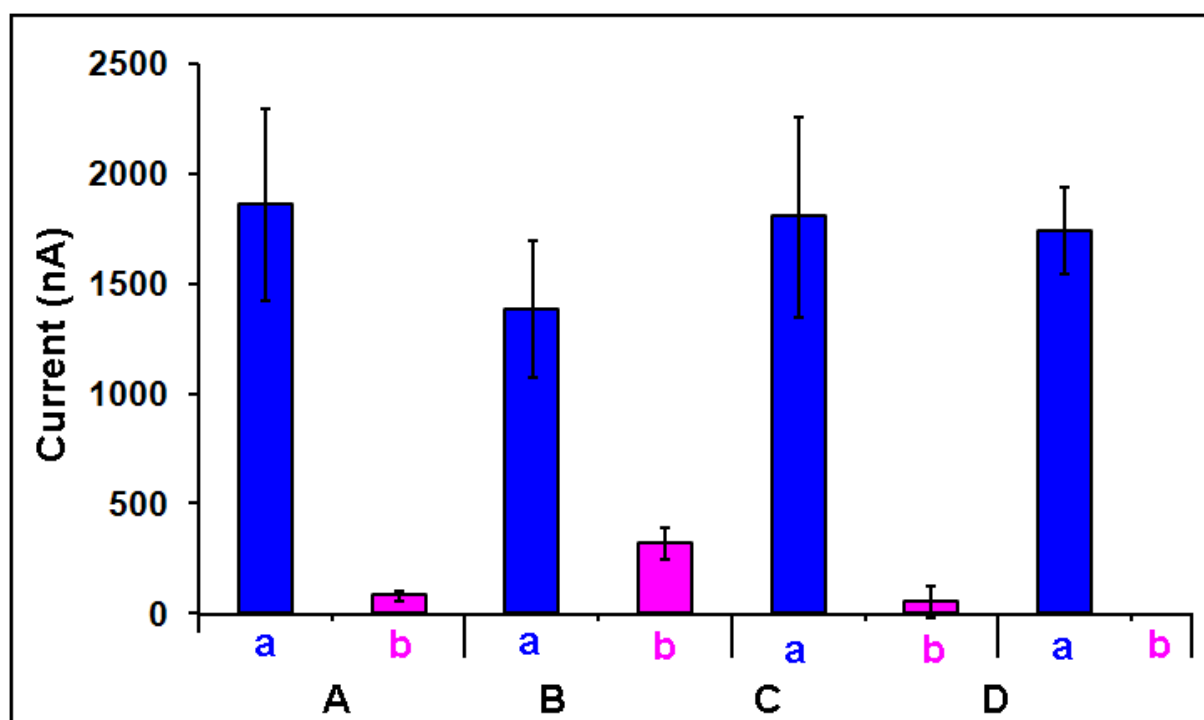

**Fig. S3.** Histograms representing the guanine (a) and adenine (b) signals by using OSN DNA probe immobilized magnetic particles before hybridization (A) and after hybridization in the presence of OSN complementary target (B), OSC target (C) and OSP target (D).

**Table S3.** Changes in the oxidation signals of guanine and adenine signals after hybridization between OSN DNA probe and its complementary target (A), OSC target (B) and OSP target (C).

|          | Guanine         | Adenine         |
|----------|-----------------|-----------------|
| <b>A</b> | %30 decreased   | % 283 increased |
| <b>B</b> | %2.8 decreased  | % 37 increased  |
| <b>C</b> | % 6.3 decreased | %100 decreased  |

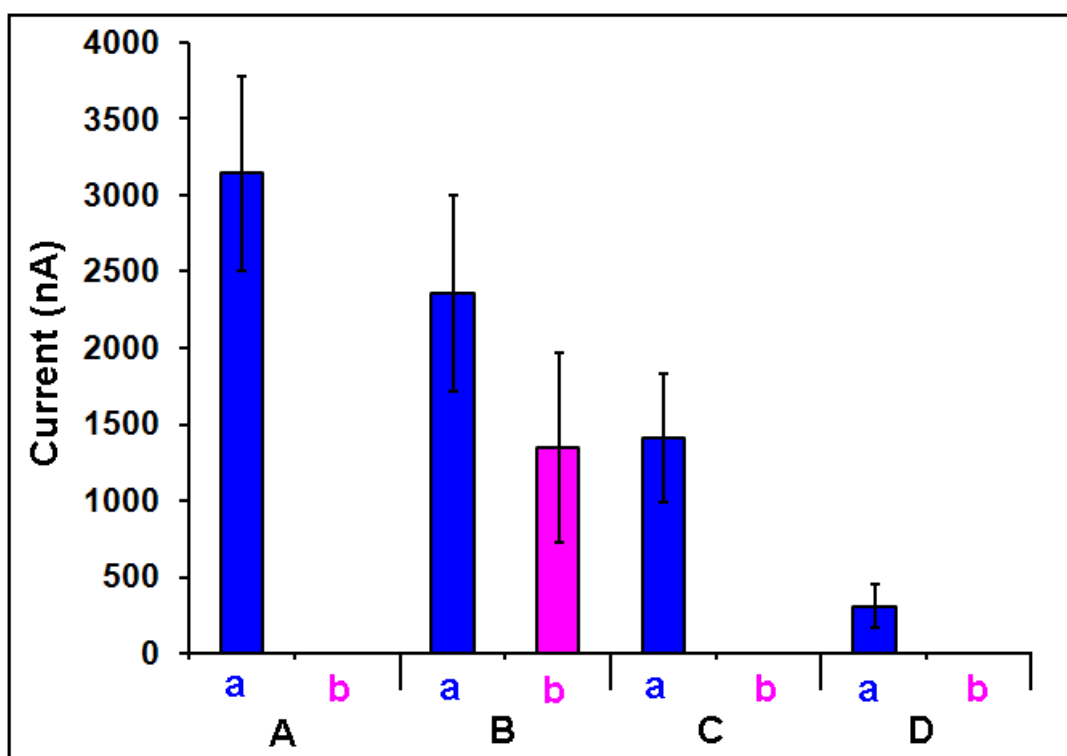

**Fig. S4.** Histograms representing the guanine (a) and adenine (b) signals by using OSP DNA probe immobilized magnetic particles before hybridization (A) and after hybridization in the presence of OSP complementary target (B), OSC target (C) and OSN target (D).

**Table S4.** Changes in the oxidation signals of guanine and adenine signals after hybridization between OSP DNA probe and its complementary target (A), OSC target (B) and OSN target (C).

|   | Guanine        | Adenine         |
|---|----------------|-----------------|
| A | %25 decreased  | % 100 increased |
| B | %55 decreased  | % 100 decreased |
| C | % 90 decreased | %100 decreased  |
